# Supplementary material
Source: Springer Nature journal article supplement (https://www.springermedizin.de/resource/supplementary/12889_2011_3330_MOESM1_ESM.pdf/9488804)
Supplement: MOESM1 [file 9488804]

**522 sputum positive TB case folders (excluding 3 MDR TB cases)**

- 227 folders: no documentation of contacts

**295 folders had documentation of contacts (783 contacts in total)**

- 42 folders: documentation of contact names, but without age (105 contacts)
- 29 folders: documentation of the following: “no contacts < 5yrs”
- 136 folders: documentation of contacts >5yrs (315 contacts) combined with contacts without documentation of age (55 contacts), but no contacts < 5yrs

**88 folders had documentation of contacts < 5yrs (112 contacts) combined with contacts >5yrs (165 contacts) and contacts without documentation of age (31 contacts)**

- 35 folders: documentation of names without surnames (47 contacts < 5yrs of age)

**53 folders had documentation of names and surnames\* (65 contacts < 5yrs of age)**

- 51 contacts < 5yrs: no individual clinic folders identified

**14 contacts < 5yrs: individual clinic folders identified**

**3 screened for TB**

**1 initiated IPT and completed 3 months of treatment**

*\*If the surname was not documented, but it was indicated that the child was the son or daughter of the adult TB case, the surname of the adult TB case was taken as the surname of the child*
